# Supplementary material for: Focal adhesion kinase-YAP signaling axis drives drug-tolerant persister cells and residual disease in lung cancer
Source: PubMed Central journal article supplement (PMC11068778; doi:10.1038/s41467-024-47423-0), 2024-05-03
Supplement: 41467_2024_47423_MOESM3_ESM.pdf [file 41467_2024_47423_MOESM3_ESM.pdf]

## Description of Additional Supplementary Files

### Supplementary Data 1

Description: Patient information.

### Supplementary Data 2

Description: Gene cluster information for RNA sequencing experiment in EGFR-mutant PC9 cells.

### Supplementary Data 3

Description: Differentially expressed genes upon overexpression of hyperactive YAP-5SA.

### Supplementary Data 4

Description: YAP-5SA gene set cluster information for scRNAseq trajectory.

### Supplementary Data 5

Description: Expression of YAP gene set cluster 3 genes in EGFR-mutant PDO models upon treatment with osimertinib.

### Supplementary Data 6

Description: Differentially expressed genes upon 24h combinatorial treatment with 10  $\mu$ M VT104 or 50 nM dasatinib in DTPs.

### Supplementary Data 7

Description: Quantification of YAP nuclear levels in IHC patient specimen.

### Supplementary Data 8

Description: LINCS L1000 Concordance score analysis and annotation.
